# Supplementary material for: First Description of the Mitogenome Features of Neofoleyellides Genus (Nematoda: Onchocercidae) Isolated from a Wild Bird (Pyrrhocorax pyrrhocorax)
Source: MDPI journal article supplement (doi:10.3390/ani12202854), 2022-10-20
Supplement: s1 [file s1]

**Table S1.** Polymerase chain reaction primers used to verify the 18S and *cox1* genes of *Neofoleyellides* sp.

| Gene | Primer   | 5'-3'                             |
|------|----------|-----------------------------------|
| 18S  | 18SF     | 5'-GAC GGG CAG CTT CCG GAA ACG-3  |
|      | 18SR     | 5-CCG CTT TTC TCG AAA CGG CTCA-3' |
| COXI | COI-intF | 5'-TGA TTG GTG GTT TTG GTA A-3'   |
|      | COI-intR | 5'-ATA AGT ACG AGT ATC AAT ATC-3' |

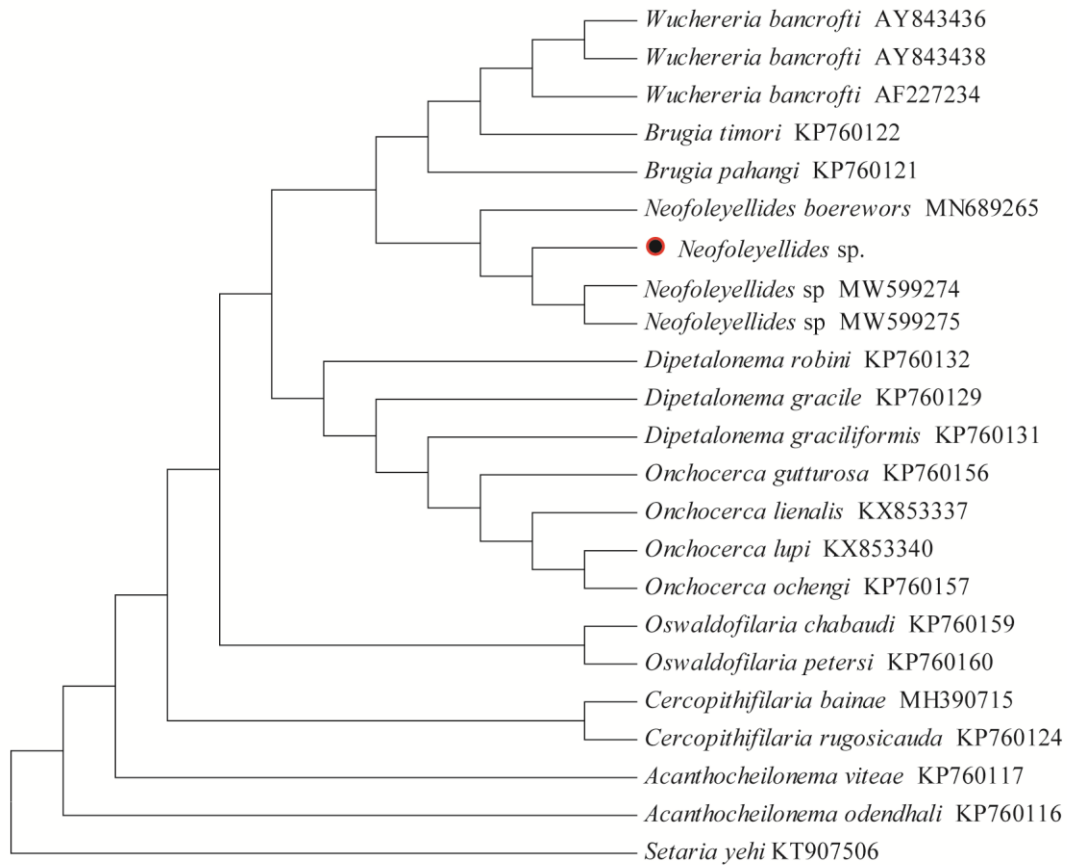

**Figure S1.** Phylogenetic reconstruction based on the 18S rRNA gene using the maximum likelihood method with *Setaria yehi* as the outgroup. The species sequenced in this study are marked with a red circle.

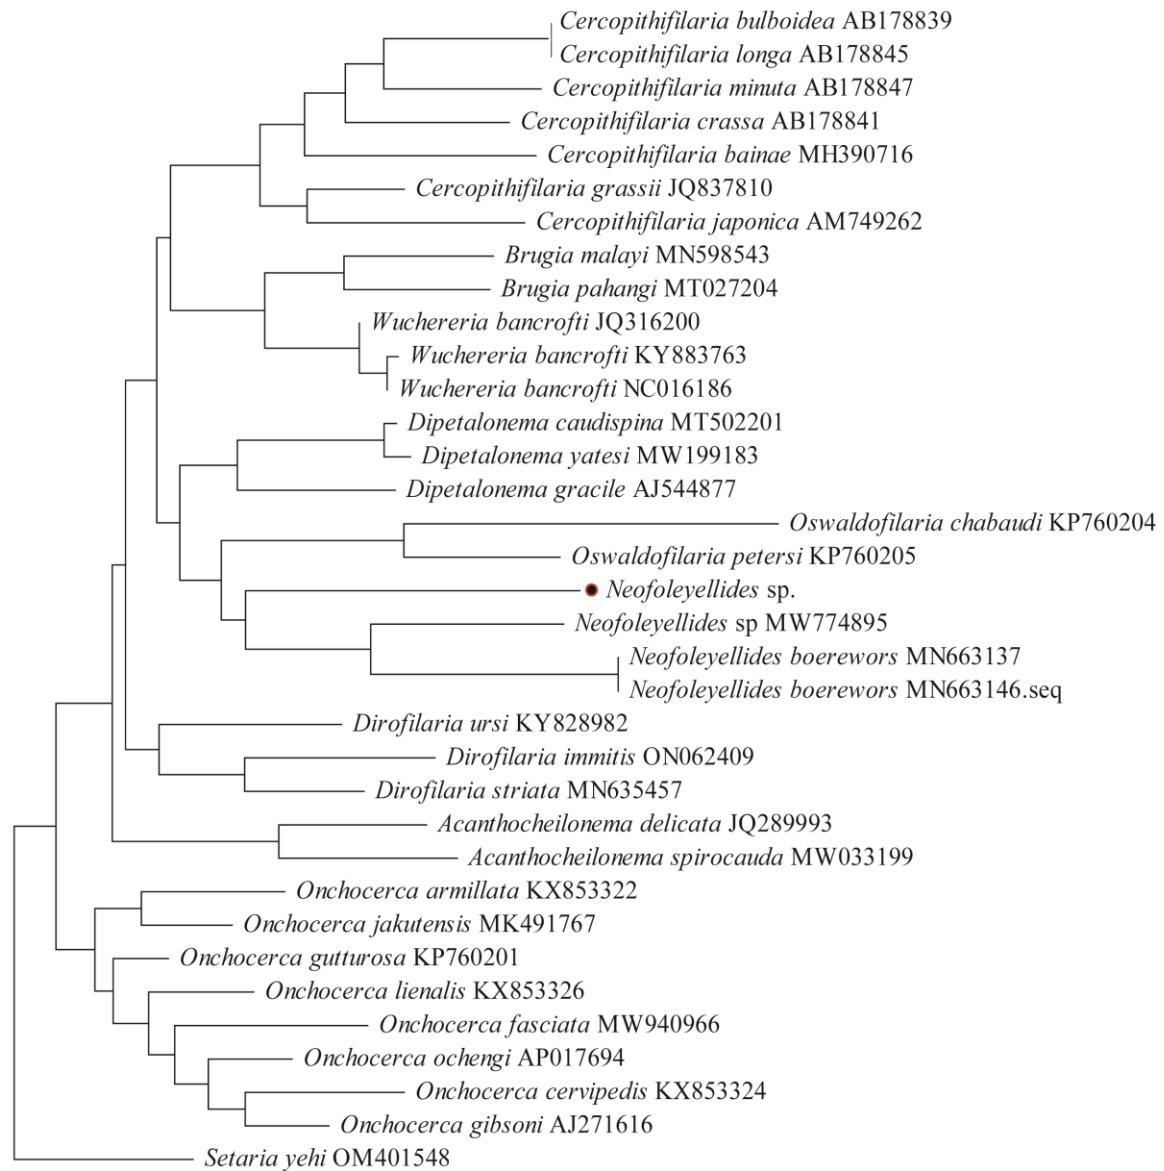

**Figure S2.** Phylogenetic reconstruction based on the *cox1* gene using the maximum likelihood method with *Setaria yehi* as the outgroup. The species sequenced in this study are marked with a red circle.
